# Supplementary material for: Acoustofluidic coating of particles and cells
Source: Royal Society of Chemistry journal article supplement (doi:10.1039/c6lc00951d), 2016-01-01
Supplement: c6lc00951d1.pdf [file c6lc00951d1.pdf]

Supplementary Material (ESI) for *Lab on a Chip*  
This journal is © The Royal Society of Chemistry 2016

## Acoustofluidic coating of particles and cells

Bugra Ayan,<sup>a</sup> Adem Ozcelik,<sup>b</sup> Shi-Yang Tang,<sup>a</sup> Yuliang Xie,<sup>a</sup> Mengxi Wu,<sup>b</sup> Hunter Bachman,<sup>b</sup> Peng Li<sup>a</sup> and Tony Jun Huang<sup>\*ab</sup>

<sup>a</sup> Department of Engineering Science and Mechanics, The Pennsylvania State University, University Park, PA 16802, USA.

<sup>b</sup> Department of Mechanical Engineering and Materials Science, Duke University, Durham, NC 27708, USA. E-mail: tony.huang@duke.edu.

### 1. The effect of acoustic power on the mixing of laminar flows

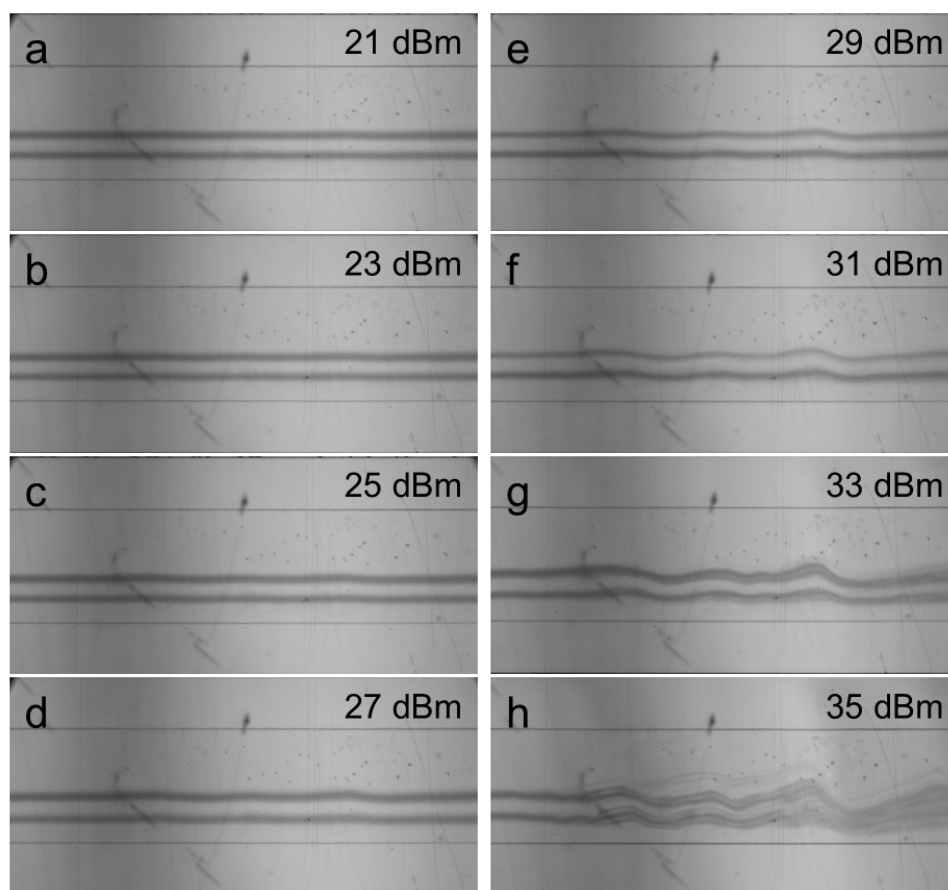

**Figure S1:** The laminar flow profile was sustained up to ~35 dBm acoustic power: (a–g) Laminar flow preserved between 21 dBm and 33 dBm. h) The layers started to mix at 35 dBm.

## **2. Video Captions**

**Supplementary Video 1:** **a)** Video taken of the active region of the acoustofluidic device. The polystyrene microparticles were deflected and migrated through multiple flows while preserving the laminar flow profile in the active region. **b)** Video taken at the outlets of the acoustofluidic device. After an RF signal was applied to the IDTs, the polystyrene microparticles left the device through the collection outlet while preserving the laminar flow profile.
